# Supplementary material
Source: PubMed Central journal article supplement (PMC3471467)

## Supporting information

### CONFORMATIONAL DYNAMICS OF TITIN PEVK EXPLORED WITH FRET SPECTROSCOPY

Tamás Huber<sup>1,2</sup>, László Grama<sup>2</sup>, Csaba Hetényi<sup>4</sup>, Gusztáv Schay<sup>1</sup>, Lívía Fülöp<sup>3</sup>, Botond Penke<sup>3</sup> and Miklós S.Z. Kellermayer<sup>1\*</sup>

<sup>1</sup>Department of Biophysics and Radiation Biology, Semmelweis University, Budapest, Hungary;

<sup>2</sup>Department of Biophysics, University of Pécs, Hungary;

<sup>3</sup>Department of Medical Chemistry, University of Szeged, Hungary;

<sup>4</sup>Department of Genetics, Eötvös Loránd University, Budapest, Hungary

Corresponding author: Miklós S.Z. Kellermayer

Tel: +36-1/267-6261

Fax: +36-1/266-6656

E-mail: kellermayer.miklos@med.semmelweis-univ.hu

The secondary structure predictions obtained on various servers are listed below.

#### GOR IV SECONDARY STRUCTURE PREDICTION METHOD

[http://npsa-pbil.ibcp.fr/cgi-bin/npsa\\_automat.pl?page=npsa\\_gor4.html](http://npsa-pbil.ibcp.fr/cgi-bin/npsa_automat.pl?page=npsa_gor4.html)

```

      10
      |
WEEAYQEREVC
ccccccceec
Sequence length :    11
GOR4 :
Alpha helix      (Hh) :    0 is  0.00%
310 helix      (Gg) :    0 is  0.00%
Pi helix        (Ii) :    0 is  0.00%
Beta bridge     (Bb) :    0 is  0.00%
Extended strand (Ee) :    3 is 27.27%
Beta turn       (Tt) :    0 is  0.00%
Bend region     (Ss) :    0 is  0.00%
Random coil     (Cc) :    8 is 72.73%
Ambiguous states (?) :    0 is  0.00%
Other states    :    0 is  0.00%
```

```

      10      20
      |      |
WEEAYQEREVIQVQKEVYEEC
ccccccchhhhhhheeeec
Sequence length :    21
GOR4 :
Alpha helix      (Hh) :    7 is 33.33%
310 helix      (Gg) :    0 is  0.00%
Pi helix        (Ii) :    0 is  0.00%
Beta bridge     (Bb) :    0 is  0.00%
Extended strand (Ee) :    6 is 28.57%
Beta turn       (Tt) :    0 is  0.00%
Bend region     (Ss) :    0 is  0.00%
Random coil     (Cc) :    8 is 38.10%
Ambiguous states (?) :    0 is  0.00%
Other states    :    0 is  0.00%
```

**NetSurfP - Protein Surface Accessibility and Secondary Structure Predictions**  
<http://www.cbs.dtu.dk/services/NetSurfP/>

```
# Column 1: Class assignment - B for buried or E for Exposed - Threshold: 25% exposure, but
not based on RSA
# Column 2: Amino acid
# Column 3: Sequence name
# Column 4: Amino acid number
# Column 5: Relative Surface Accessibility - RSA
# Column 6: Absolute Surface Accessibility
# Column 7: Z-fit score for RSA prediction
# Column 8: Probability for Alpha-Helix
# Column 9: Probability for Beta-strand
# Column 10: Probability for Coil
E W Sequence      1   0.711 171.044 -1.467  0.016  0.005  0.979
E E Sequence      2   0.693 121.102  0.301  0.430  0.016  0.555
E E Sequence      3   0.669 116.874  0.500  0.522  0.016  0.462
E A Sequence      4   0.402  44.311 -0.160  0.622  0.015  0.363
E Y Sequence      5   0.292  62.443  0.077  0.622  0.015  0.363
E Q Sequence      6   0.562 100.427  1.222  0.561  0.047  0.393
E E Sequence      7   0.664 116.018  0.837  0.605  0.105  0.290
E R Sequence      8   0.455 104.264  0.339  0.386  0.097  0.517
E E Sequence      9   0.673 117.486  0.036  0.268  0.043  0.689
E V Sequence     10   0.456  70.118  0.421  0.184  0.043  0.773
E C Sequence     11   0.750 105.356 -1.584  0.003  0.003  0.994
```

```
# Column 1: Class assignment - B for buried or E for Exposed - Threshold: 25% exposure, but
not based on RSA
# Column 2: Amino acid
# Column 3: Sequence name
# Column 4: Amino acid number
# Column 5: Relative Surface Accessibility - RSA
# Column 6: Absolute Surface Accessibility
# Column 7: Z-fit score for RSA prediction
# Column 8: Probability for Alpha-Helix
# Column 9: Probability for Beta-strand
# Column 10: Probability for Coil
E W Sequence      1   0.725 174.411 -1.373  0.016  0.005  0.979
E E Sequence      2   0.701 122.412  0.322  0.339  0.016  0.645
E E Sequence      3   0.677 118.289  0.456  0.522  0.016  0.462
E A Sequence      4   0.433  47.661 -0.160  0.522  0.016  0.462
E Y Sequence      5   0.314  67.016 -0.148  0.622  0.015  0.363
E Q Sequence      6   0.562 100.445  0.833  0.660  0.049  0.291
E E Sequence      7   0.593 103.667  0.172  0.660  0.049  0.291
E R Sequence      8   0.397  90.913  0.590  0.751  0.050  0.199
E E Sequence      9   0.521  91.054  0.083  0.751  0.050  0.199
B V Sequence     10   0.241  37.119  0.450  0.779  0.100  0.120
B I Sequence     11   0.198  36.611  0.494  0.779  0.100  0.120
E Q Sequence     12   0.525  93.747  0.993  0.779  0.100  0.120
B V Sequence     13   0.190  29.249  0.025  0.831  0.044  0.125
B Q Sequence     14   0.276  49.329  0.337  0.879  0.010  0.111
E K Sequence     15   0.508 104.434  0.620  0.938  0.007  0.055
E E Sequence     16   0.588 102.689  1.166  0.938  0.007  0.055
B V Sequence     17   0.169  25.975 -0.214  0.938  0.007  0.055
E Y Sequence     18   0.296  63.255 -0.020  0.879  0.010  0.111
E E Sequence     19   0.741 129.453  0.714  0.717  0.014  0.269
E E Sequence     20   0.729 127.409  0.938  0.622  0.015  0.363
E C Sequence     21   0.692  97.213 -1.939  0.016  0.005  0.979
```

**Jpred3**  
 Cole C, Barber JD & Barton GJ. Nucleic Acids Res. 2008.  
<http://www.compbio.dundee.ac.uk/www-jpred/>

```
jp_sQjw0lW : WEEAYQEREVIQVQKEVYEEC : jp_sQjw0lW
          : 1-----11----- :
OrigSeq    : WEEAYQEREVIQVQKEVYEEC : OrigSeq
Jnet       : ---HH---HHHHHHHHHH--- : Jnet
jhmm      : ---HH---HHHHHHHHHH--- : jhmm
```

Lupas 14 : ----- : Lupas 14  
Lupas 21 : ----- : Lupas 21  
Lupas 28 : ----- : Lupas 28  
  
Jnet\_25 : ----B----BB-B---BB--- : Jnet\_25  
Jnet\_5 : ----- : Jnet\_5  
Jnet\_0 : ----- : Jnet\_0  
Jnet Rel : 997113555788899986289 : Jnet Rel

Key:

Colour code for alignment:

Blue - Complete identity at a position  
Shades of red - The more red a position is, the higher the level of conservation of chemical properties of the amino acids

Jnet - Final secondary structure prediction for query  
jalign - Jnet alignment prediction  
jhmm - Jnet hmm profile prediction  
jpssm - Jnet PSIBLAST pssm profile prediction

Lupas - Lupas Coil prediction (window size of 14, 21 and 28)

Note on coiled coil predictions - = less than 50% probability  
c = between 50% and 90% probability  
C = greater than 90% probability

Jnet\_25 - Jnet prediction of burial, less than 25% solvent accesibility  
Jnet\_5 - Jnet prediction of burial, less than 5% exposure  
Jnet\_0 - Jnet prediction of burial, 0% exposure  
Jnet Rel - Jnet reliability of prediction accuracy, ranges from 0 to 9, bigger is better.

**The PSIPRED Protein Structure Prediction Server**

<http://bioinf.cs.ucl.ac.uk/psipred/>

Conf: 98888878639  
Pred: CHHHHHHHHHHC  
AA: WEEAYQEREVC

Conf: 978777788999999998759  
Pred: CHHHHHHHHHHHHHHHHHHC  
AA: WEEAYQEREVIQVQKEVYEEC

Key

Conf: Confidence (0=low, 9=high)

Pred: Predicted secondary structure (H=helix, E=strand, C=coil)

AA: Target sequence

**Distance between the aromatic rings of the terminal residues (PEVK21)**

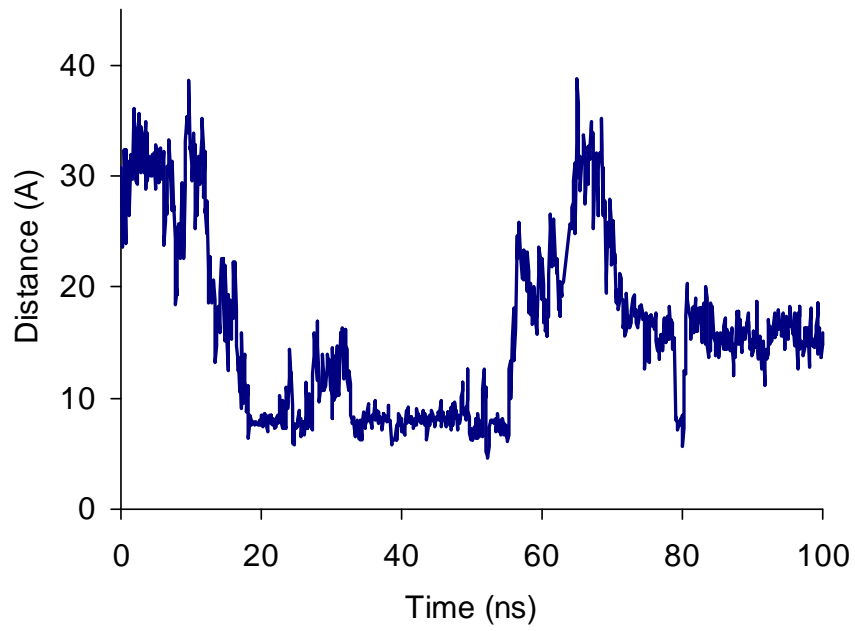

**Distance between the aromatic rings of the terminal residues (PEVK11)**

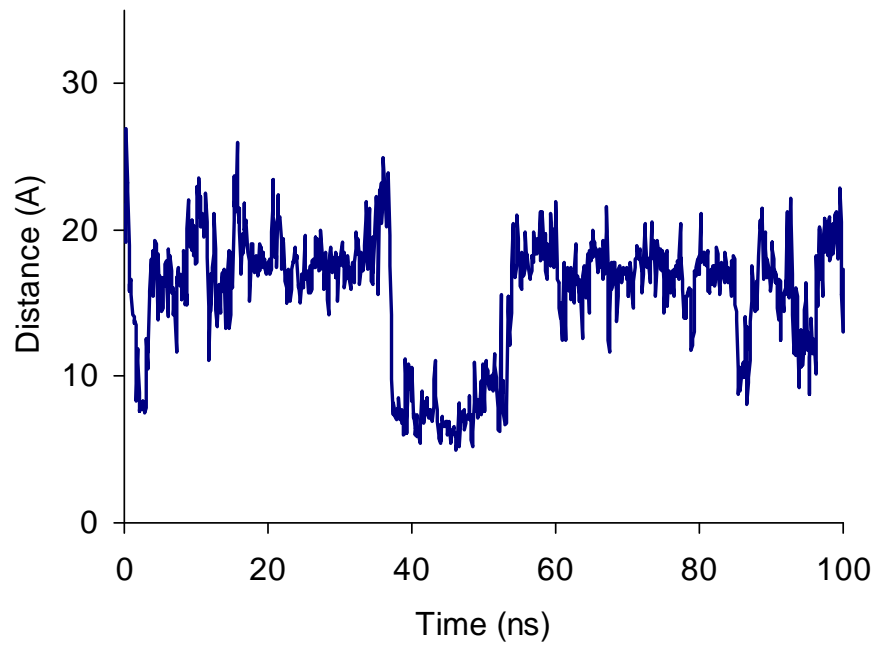

Supplement: mmc1.pdf [file mmc1.pdf]
